# Supplementary material for: Spizaetus hawk-eagles as predators of arboreal colobines
Source: Springer Nature journal article supplement (doi:10.1007/s10329-011-0240-z), 2011-02-21
Supplement: MOESM1 [file 10329_2011_240_MOESM1_ESM.doc]

Supplementary Information


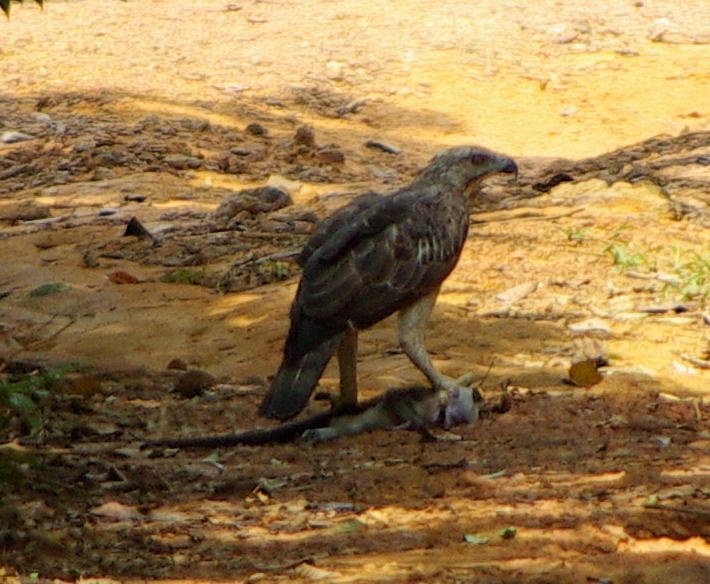


Figure S1: The changeable hawk-eagle *Spizaetus cirrhatus* kills its prey by pressing it onto the ground with its weight and suffocating it. The juvenile langur *Presbytis femoralis* was still alive at the time this picture was taken (photo: Fam Shun Deng).


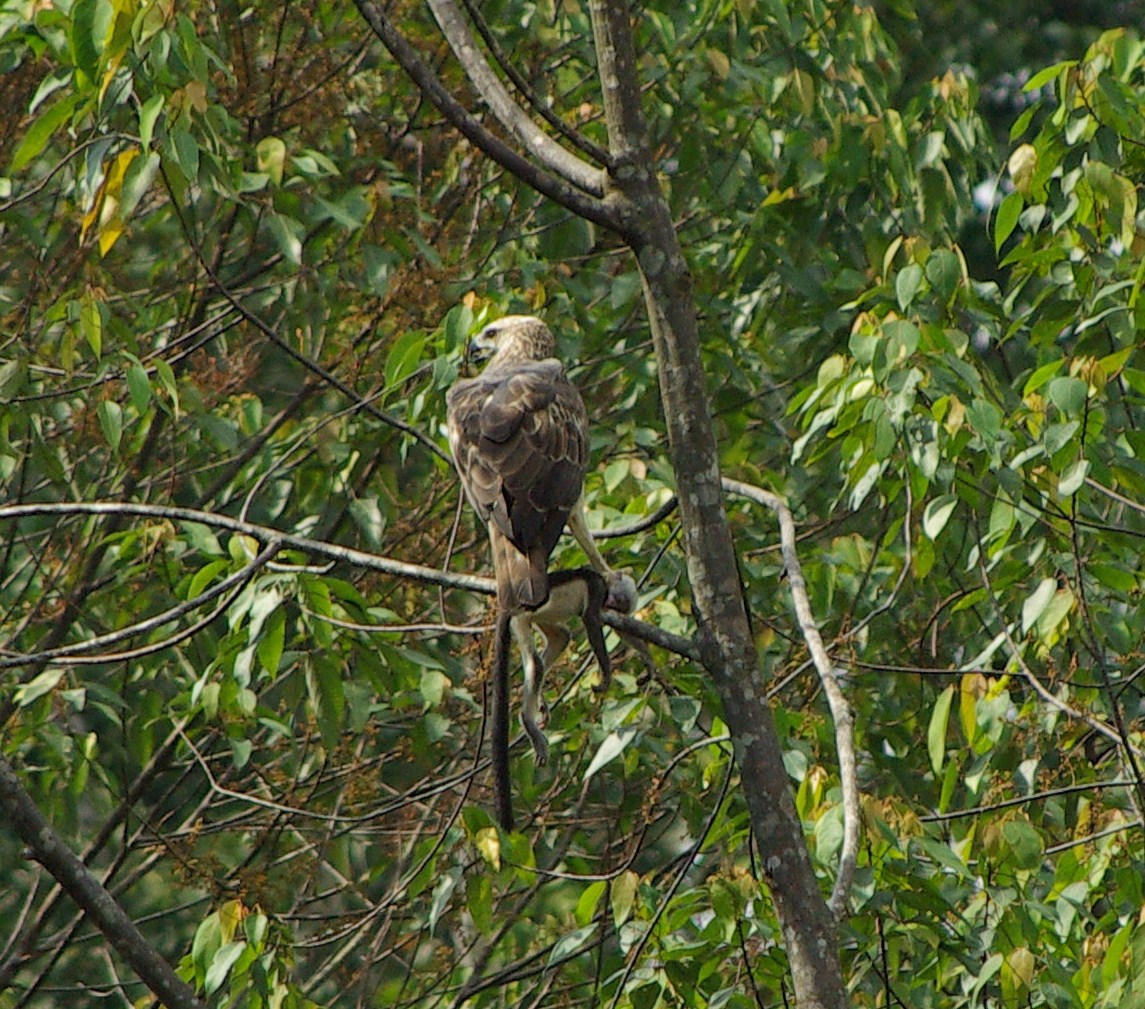


Figure S2: Pale-morph changeable hawk eagle (*Spizaetus cirrhatus*) with juvenile banded langur *Presbytis femoralis* in Panti Forest Reserve, Malaysia (photo: Fam Shun Deng).


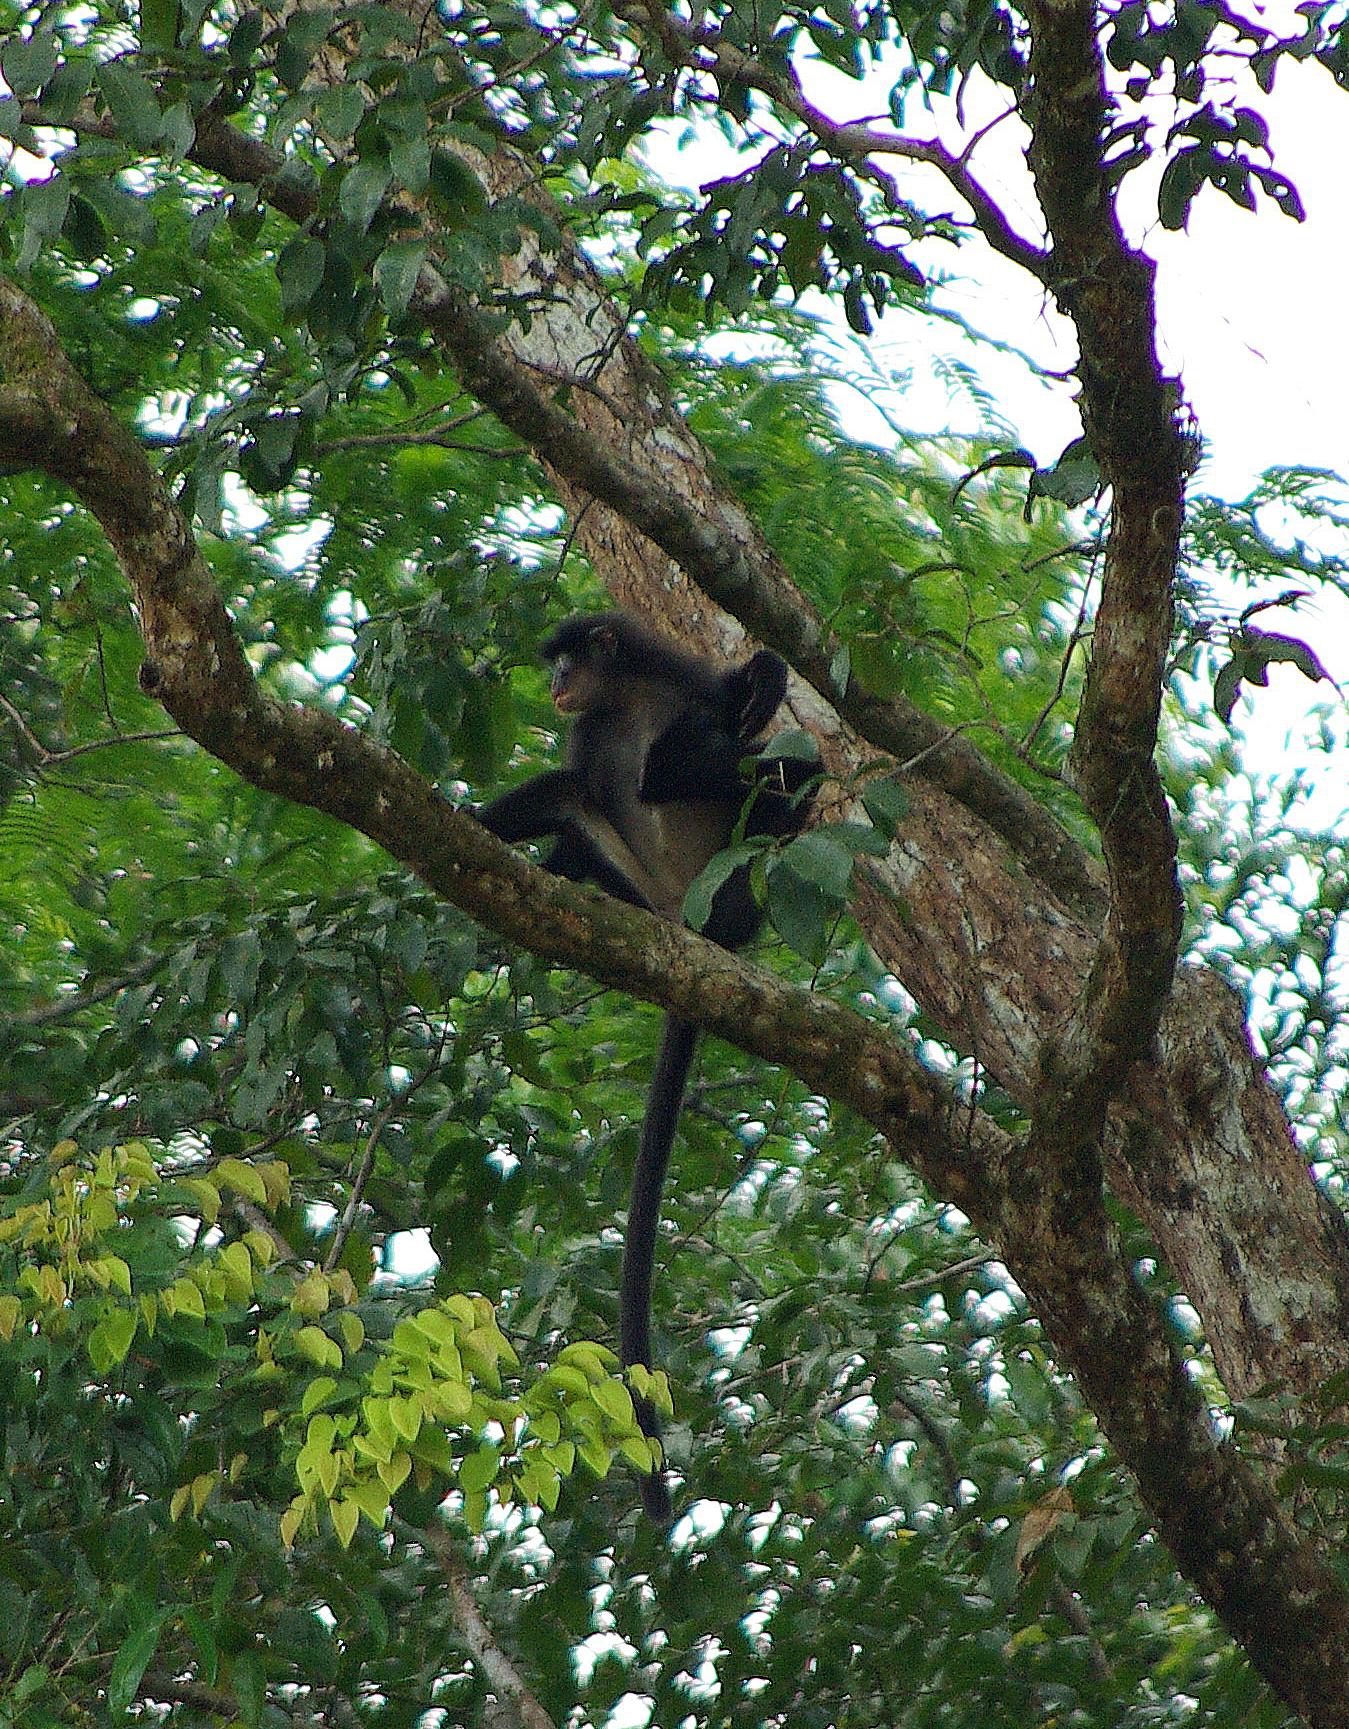


Figure S3**:** Adult member of banded langur *Presbytis femoralis* troop in the same vicinity looking distinctly relaxed in the presence of the changeable hawk-eagle *Spizaetus cirrhatus*. (photo: Fam Shun Deng).

**Supplementary Table 1**. Recorded predation events by diurnal raptors on diurnal primates in Asia. All refer to single predation events, apart from mountain hawk-eagle predating on Formosan rock macaque (4) and Japanese macaque (3), and Philippine eagle predating on long-tailed macaque (>12).

| Primate species | Eagle species | Country | Reference |
| --- | --- | --- | --- |
| Sichuan snub-nosed monkey  *Rhinopithecus* *roxellane* | goshawk  *Accipiter gentilis* | China | Zang et al. 1999 |
| Sichuan snub-nosed monkey  *Rhinopithecus* *roxellane* | golden eagle  *Aquila chrysaetos* | China | Li 2007 |
| lion-tailed macaque  *Macaca silenus* | changeable hawk-eagle  *Spizaetus cirrhatus* | India | Umapathy and Kumar 2000 |
| Japanese macaque  *Macaca fuscata* | mountain hawk-eagle  *Spizaetus nipalensis* | Japan | Iida 1999;  T Yamazaki *in* Peregrine Fund 2010 |
| Formosan rock macaque  *Macaca cyclopis* | mountain hawk-eagle  *Spizaetus nipalensis* | Taiwan | Sun et al. 2009 |
| Assamese macaque  *Macaca assamensis* | mountain hawk-eagle  *Spizaetus nipalensis* | Nepal | G. Regmi, pers. comm.. 2010 |
| ebony langur  *Trachypithecus auratus* | Javan hawk-eagle  *Spizaetus bartelsi* | Indonesia | Nijman et al. 2000 |
| long-tailed macaque  *Macaca fascicularis* | Javan hawk-eagle  *Spizaetus bartelsi* | Indonesia | Prawiradilaga 2006 |
| banded langur  *Presbytis femoralis* | changeable hawk-eagle  *Spizaetus cirrhatus* | Malaysia | This study |
| long-tailed macaque  *Macaca fascicularis* | Philippine eagle  *Pithecophaga jefferyi* | Philippines | Clemens 1907; Gonzales, 1968; Kennedy 1985; R Crombie and PL Alviola *in* Collar et al. 2001 |

**References**

Clemens J (1907) Notes from the Philippines. Condor 9: 92-93.

Collar NJ, Andreev JV, Chan S, Crosby MJ, Subramanya S, Tobias JA, eds. (2001) Threatened birds of Asia. BirdLife International, Cambridge.

Gonzales RB (1968) A study of the breeding biology and ecology of the monkey-eating eagle. Silliman J. 15: 461–491

Iida T (1999) Predation of Japanese macaque *Macaca fuscata* by mountain hawk eagle *Spizaetus nipalensis*. Japan J Ornithol 47: 125-127.

Kennedy RS (1985) Conservation research of the Philippine Eagle. Natl Geogr Soc Res Rep 18: 401-414

Li YM (2007) Terrestriality and tree stratum use in a group of Sichuan snub-nosed monkeys. Primates 48:197–207

Nijman V, van Balen S, Sözer R (2000) Breeding biology of Javan Hawk-eagle *Spizaetus bartelsi* in West Java, Indonesia. Emu 100: 125-132

Peregrine Fund (2010) Global Raptor Information Network. www.globalraptors.org/grin, accessed 9 September 2010.

Prawiradilaga DM (2009) Ecology and conservation of endangered Javan hawk-eagle *Spizaetus bartelsi*. Ornithol Sci 5: 177–186.

Umapathy G, Kumar A (2000) The demography of the Lion-tailed macaque (*Macaca silenus*) in rain forest fragments in the Anamalai Hills, South India. Primates 41: 119-126

Fam SD, Nijman V (2010) *Spizaetus* hawk-eagles as predators of arboreal colobines. Primates

Sun YH, Huang YK, Tsai WH, Hong SY, Chen CC (2009). Breeding-season diet of the mountain hawk-eagle in southern Taiwan. J Raptor Res 43: 159-163

Zhang S, Ren B, Li B. (1999) A juvenile Sichuan golden monkey (*Rhinopithecus roxellana*) predated by a goshawk (*Accipiter gentilis*) in the Qinling Mountains. Folia Primatol 70: 175-176.
